# Supplementary material
Source: PubMed Central journal article supplement (PMC6788641)
Supplement: NIHMS1052226-supplement-supporting_information.pdf [file NIHMS1052226-supplement-supporting_information.pdf]

## Supplementary Information

### **Stabilizing a Ni<sup>II</sup>-aqua complex via intramolecular hydrogen bonds: synthesis, structure, and redox properties**

Deborah Brazzolotto, Justin A. Bogart, Dolores L. Ross, Joseph W. Ziller and A. S. Borovik\*

Department of Chemistry, University of California – Irvine, 1102 Natural Sciences II, Irvine, California 92697, United States.

Email: aborovik@uci.edu

|                                                                                                                                                                     |            |
|---------------------------------------------------------------------------------------------------------------------------------------------------------------------|------------|
| <b>Figure S1.</b> <sup>1</sup> H NMR spectrum of [Ni(ibaps)(H <sub>2</sub> O)] <sup>-</sup> .                                                                       | <b>S2</b>  |
| <b>Figure S2.</b> DFT computed structure for [Ni(ibaps)(H <sub>2</sub> O)] <sup>-</sup> .                                                                           | <b>S3</b>  |
| <b>Figure S3.</b> TD-DFT computed vertical excitations for (A) [Ni(ibaps)(H <sub>2</sub> O)] <sup>-</sup> and (B) [Ni(ibaps)(H <sub>2</sub> O)].                    | <b>S4</b>  |
| <b>Figure S4.</b> Highest occupied to lowest unoccupied natural transition orbitals for select vertical excitations of [Ni(ibaps)(H <sub>2</sub> O)] <sup>-</sup> . | <b>S5</b>  |
| <b>Figure S5.</b> Highest occupied to lowest unoccupied natural transition orbitals for select vertical excitations of [Ni(ibaps)(H <sub>2</sub> O)].               | <b>S6</b>  |
| <b>Table S1.</b> DFT optimized coordinates for [Ni(ibaps)(H <sub>2</sub> O)] <sup>-</sup> .                                                                         | <b>S7</b>  |
| <b>Table S2.</b> DFT optimized coordinates for [Ni(ibaps)(H <sub>2</sub> O)].                                                                                       | <b>S10</b> |
| <b>Table S3.</b> Assignments of the TD-DFT computed vertical excitations for [Ni(ibaps)(H <sub>2</sub> O)] <sup>-</sup> and [Ni(ibaps)(H <sub>2</sub> O)].          | <b>S12</b> |
| <b>Table S4.</b> Crystallographic Data for (Et <sub>4</sub> N)[Ni <sup>II</sup> (ibaps)(OH <sub>2</sub> )].                                                         | <b>S13</b> |

**A**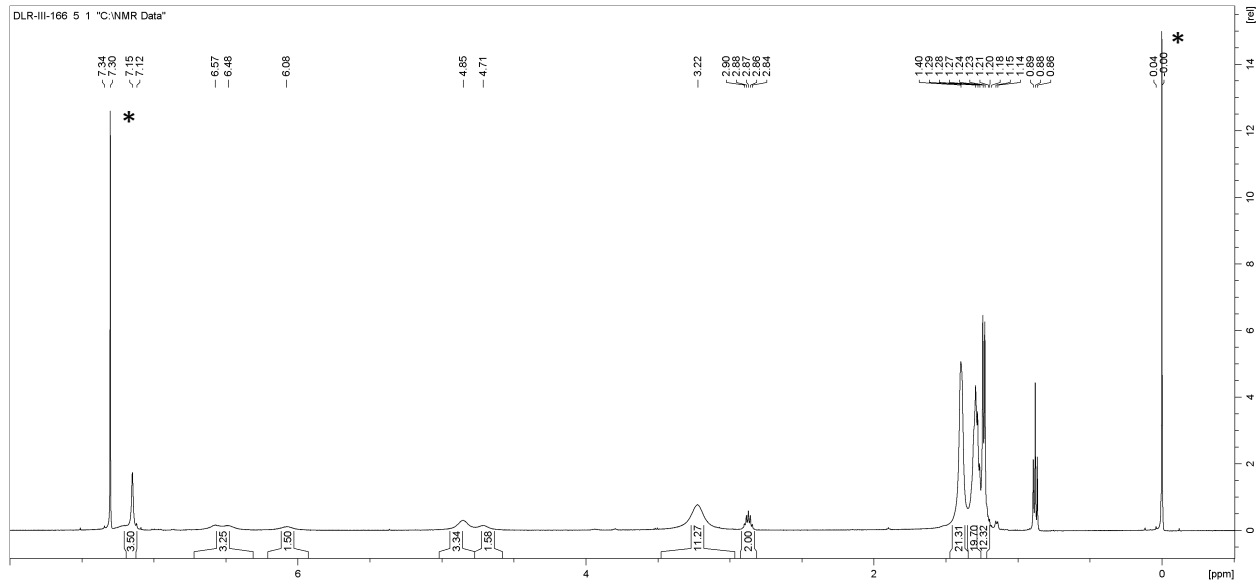**B**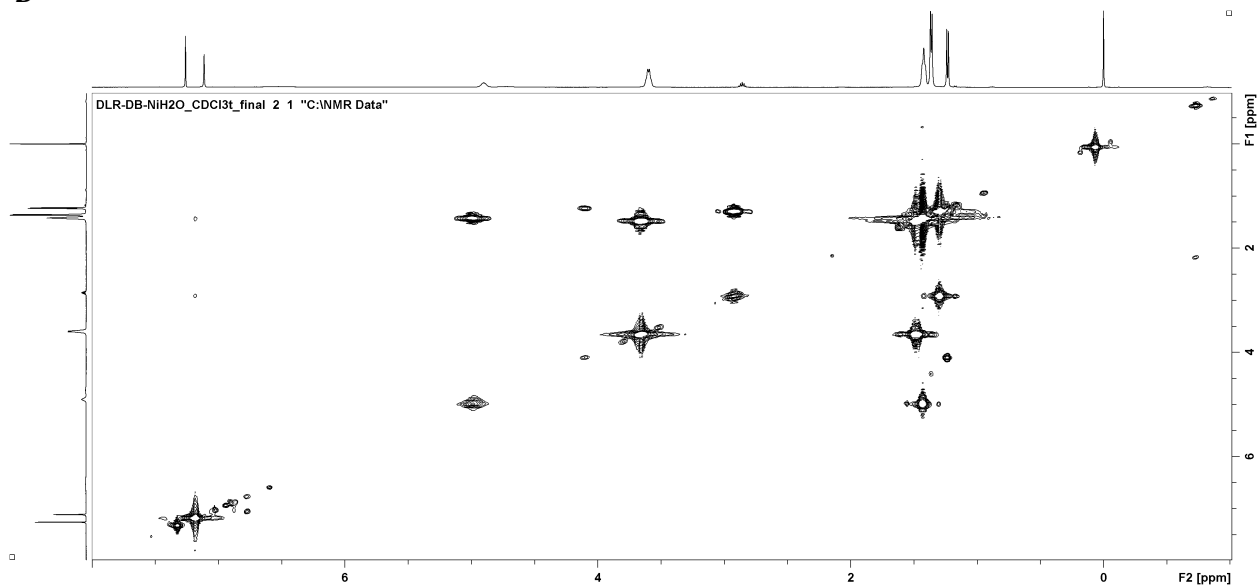

**Figure S1.** <sup>1</sup>H NMR spectrum of [Ni(ibaps)(H<sub>2</sub>O)]<sup>-</sup> measured at 218 K (**A**) and its COSY spectrum collected at room temperature (**B**). The spectra were recorded in CDCl<sub>3</sub>.

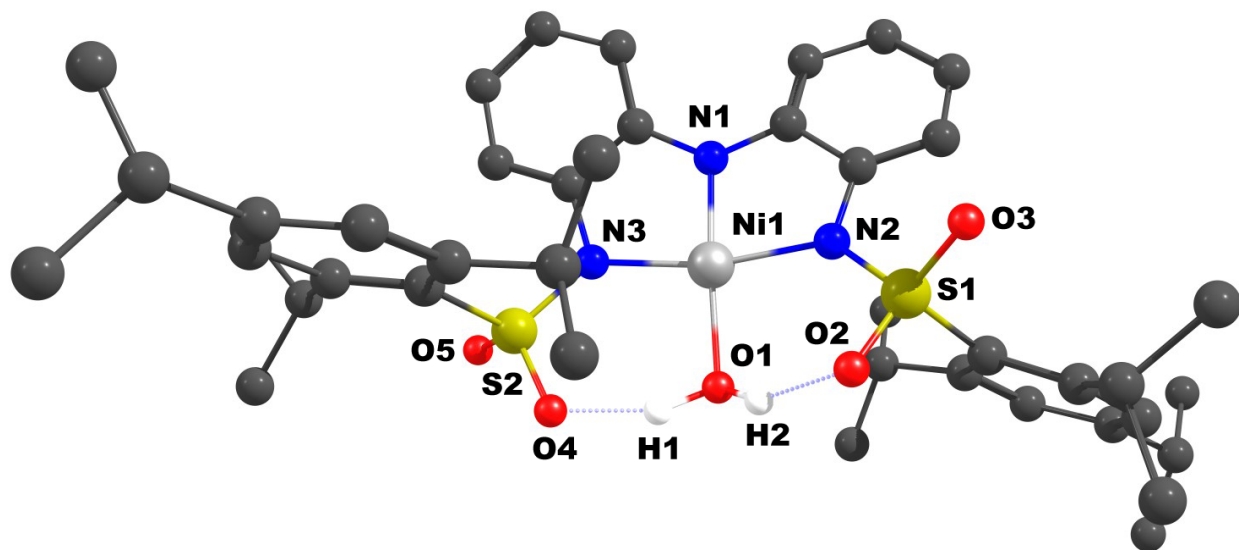

Figure S2. DFT computed structure for [Ni(ibaps)(H<sub>2</sub>O)]<sup>-</sup>.

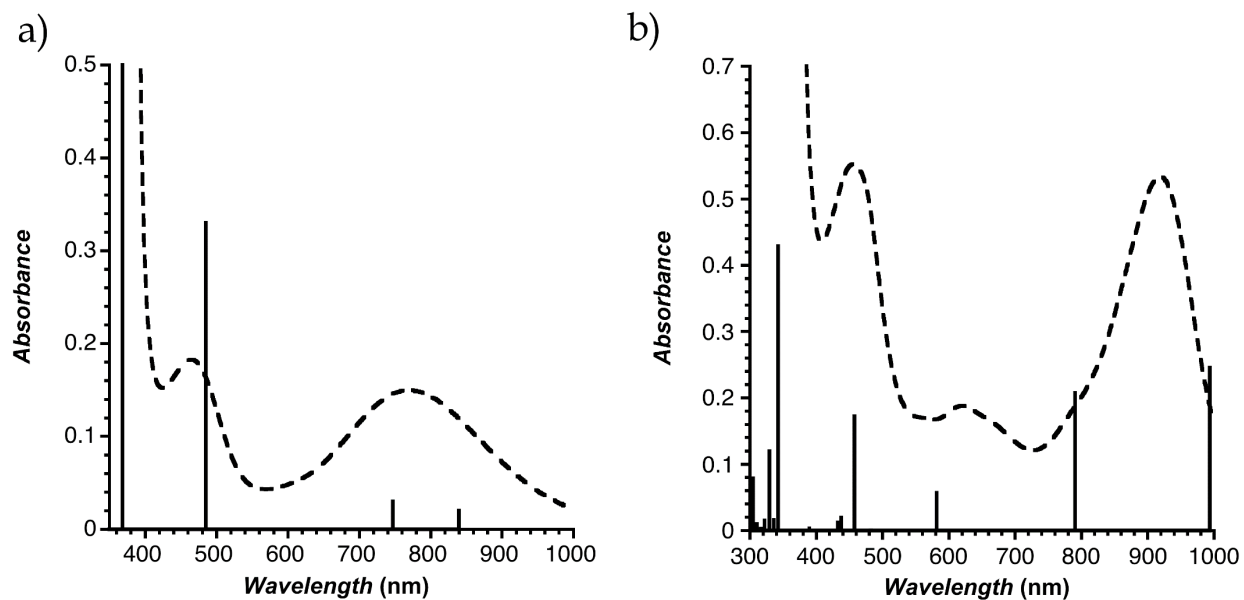

**Figure S3.** TD-DFT computed vertical excitations for (A) [Ni(ibaps)(H<sub>2</sub>O)]<sup>-</sup> and (B) [Ni(ibaps)(H<sub>2</sub>O)] compared to the experimentally determined electronic absorption spectra (dashed lines).

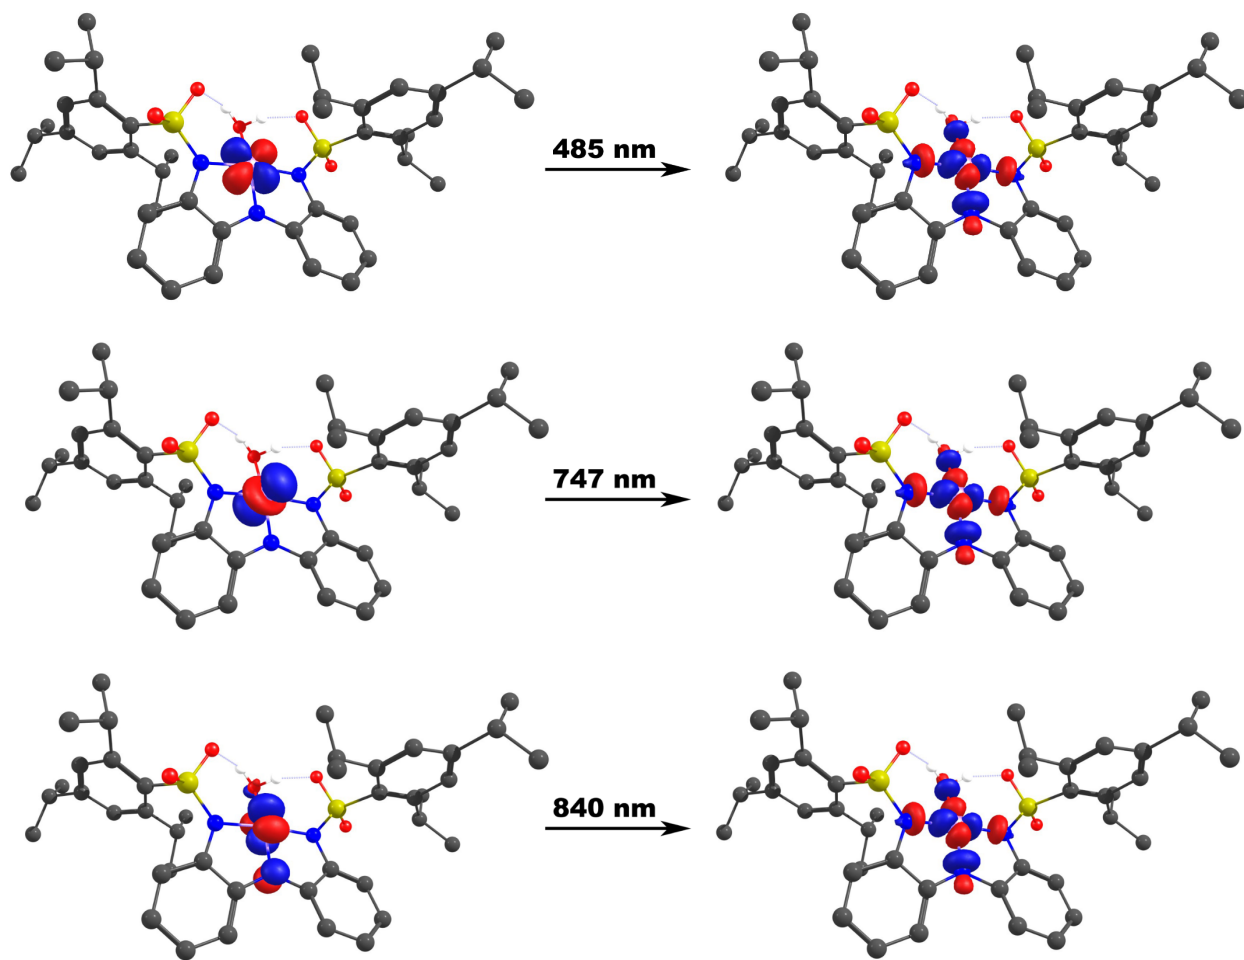

**Figure S4.** Highest occupied to lowest unoccupied natural transition orbitals for select vertical excitations of [Ni(ibaps)(H<sub>2</sub>O)]<sup>-</sup>.

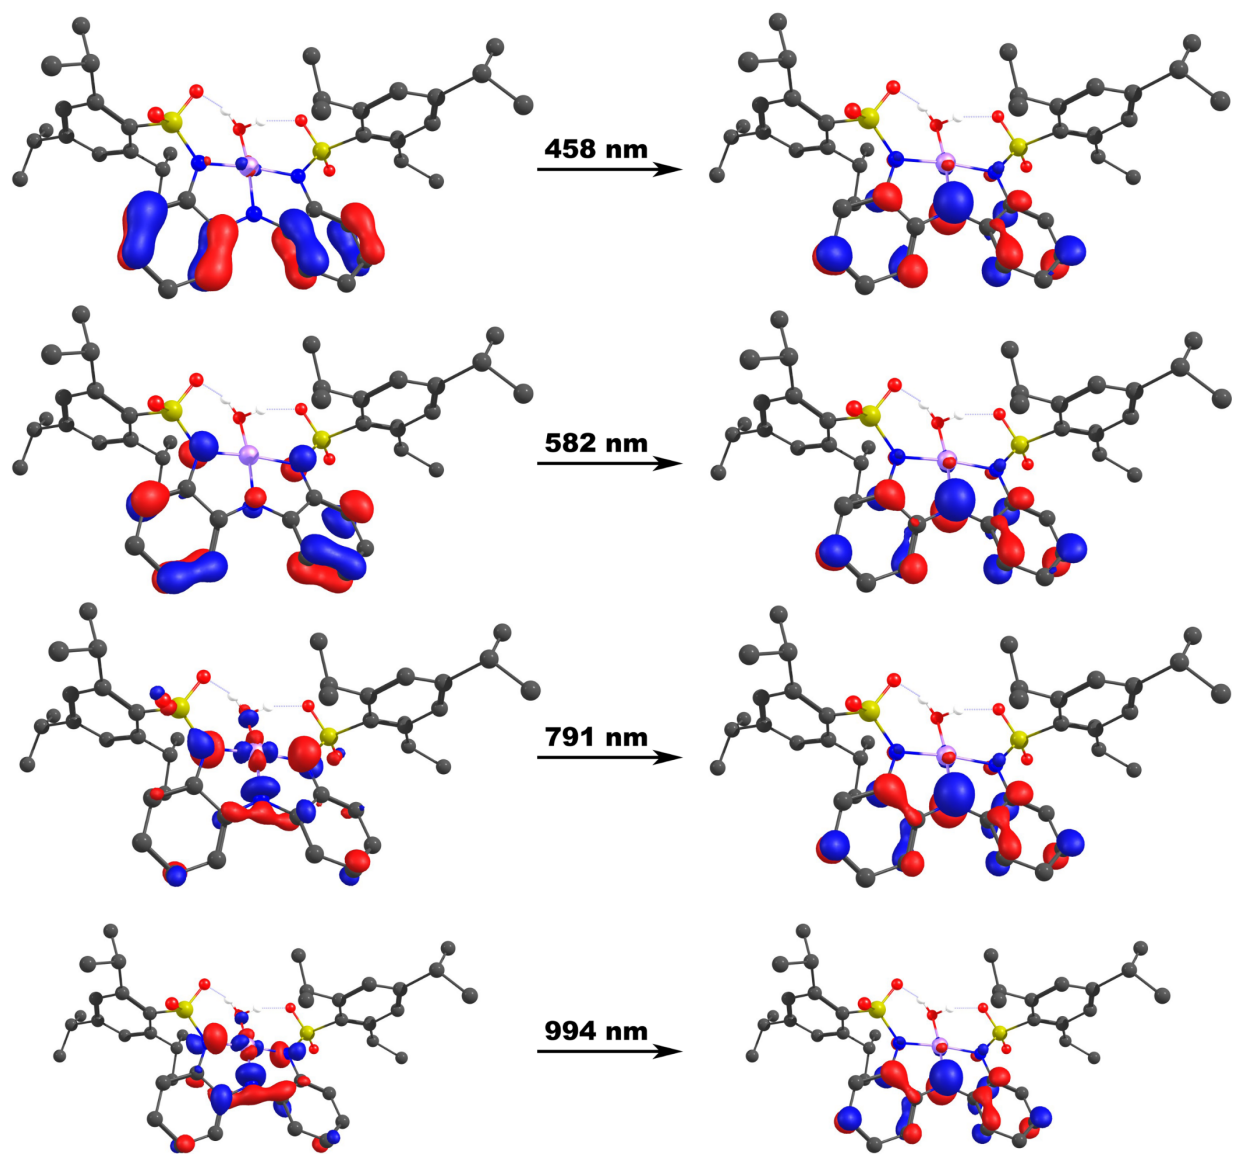

**Figure S5.** Highest occupied to lowest unoccupied natural transition orbitals for select vertical excitations of [Ni(ibaps)(H<sub>2</sub>O)].

**Table S1.** DFT optimized coordinates for [Ni(ibaps)(H<sub>2</sub>O)]<sup>-</sup>.

|    |             |              |              |
|----|-------------|--------------|--------------|
| Ni | 5.622988287 | 4.873833225  | 7.150510382  |
| S  | 6.860822563 | 6.129839654  | 9.861964069  |
| S  | 3.462309716 | 5.485724683  | 4.885789414  |
| O  | 5.749678983 | 6.745876533  | 6.811066937  |
| H  | 5.931859840 | 7.209115862  | 7.671002086  |
| H  | 4.875066150 | 7.039254146  | 6.453016720  |
| O  | 6.350186944 | 7.382844118  | 9.222704988  |
| O  | 8.293760415 | 6.196319768  | 10.217540541 |
| O  | 3.386429048 | 6.740486492  | 5.700450841  |
| O  | 2.180366151 | 4.773907754  | 4.702384914  |
| N  | 5.734669664 | 3.048947284  | 7.285092698  |
| N  | 6.565784815 | 4.879172566  | 8.841814687  |
| N  | 4.540680068 | 4.503042564  | 5.607505937  |
| C  | 6.259371396 | 2.549832748  | 8.464098709  |
| C  | 6.275058697 | 1.215301755  | 8.912307023  |
| H  | 5.767619097 | 0.447488901  | 8.344355740  |
| C  | 6.905981861 | 0.866458651  | 10.111211104 |
| H  | 6.906350222 | -0.173721830 | 10.427711858 |
| C  | 7.532937572 | 1.839965022  | 10.882237226 |
| H  | 8.056532424 | 1.574937545  | 11.796823738 |
| C  | 7.479145276 | 3.183182338  | 10.483124654 |
| H  | 7.971395743 | 3.930278091  | 11.089929242 |
| C  | 6.808017288 | 3.556194020  | 9.315970308  |
| C  | 5.332192212 | 2.341728969  | 6.160664282  |
| C  | 5.598392817 | 0.997947243  | 5.833847747  |
| H  | 6.202213586 | 0.386867539  | 6.490358906  |
| C  | 5.134664892 | 0.445790477  | 4.635081363  |
| H  | 5.356424032 | -0.594867995 | 4.411310465  |
| C  | 4.405779346 | 1.219765545  | 3.736504855  |
| H  | 4.034848606 | 0.793656762  | 2.808307449  |
| C  | 4.166235839 | 2.571448707  | 4.021092595  |
| H  | 3.617808408 | 3.172924898  | 3.306161389  |
| C  | 4.629987455 | 3.138665492  | 5.209228015  |
| C  | 5.831456183 | 5.956095999  | 11.377878449 |
| C  | 6.391395352 | 5.937589401  | 12.685693876 |
| C  | 5.502034085 | 5.956208767  | 13.769065651 |
| H  | 5.920665307 | 5.957245954  | 14.769999285 |
| C  | 4.115900192 | 5.980534357  | 13.624635400 |
| C  | 3.607646824 | 5.976375871  | 12.327750658 |
| H  | 2.529674375 | 5.991601517  | 12.192886026 |
| C  | 4.422774879 | 5.965383377  | 11.190225899 |
| C  | 7.882258216 | 5.935747070  | 13.056371214 |
| H  | 8.467032785 | 5.711655322  | 12.170714082 |
| C  | 8.230576705 | 4.862793037  | 14.107509057 |
| H  | 7.801032525 | 5.073692815  | 15.093066864 |
| H  | 9.318819557 | 4.817567153  | 14.231968054 |

|   |              |             |              |
|---|--------------|-------------|--------------|
| H | 7.885126039  | 3.870758625 | 13.795039788 |
| C | 8.319157219  | 7.336618263 | 13.530605207 |
| H | 8.145429387  | 8.088132085 | 12.752715709 |
| H | 9.389065403  | 7.338592412 | 13.771202734 |
| H | 7.771271226  | 7.645495584 | 14.428937827 |
| C | 3.185981283  | 6.008497670 | 14.829044459 |
| H | 2.158817281  | 6.029414671 | 14.441922197 |
| C | 3.329269586  | 4.739402455 | 15.691029270 |
| H | 3.153684950  | 3.835121692 | 15.097836550 |
| H | 2.604820074  | 4.753520999 | 16.513609533 |
| H | 4.331320308  | 4.665457454 | 16.129944280 |
| C | 3.387308165  | 7.279486700 | 15.676251731 |
| H | 4.393417014  | 7.314834840 | 16.110694981 |
| H | 2.666460794  | 7.306078809 | 16.501718867 |
| H | 3.248648115  | 8.183996036 | 15.073675640 |
| C | 3.691319753  | 5.976963892 | 9.843128005  |
| H | 4.412308562  | 5.885598688 | 9.036274626  |
| C | 2.938465965  | 7.303006194 | 9.624940129  |
| H | 2.132289387  | 7.440800934 | 10.355002957 |
| H | 2.492378095  | 7.314589673 | 8.623435566  |
| H | 3.620654471  | 8.155636104 | 9.703596612  |
| C | 2.746552665  | 4.766883217 | 9.704192254  |
| H | 3.294581356  | 3.824524155 | 9.815011548  |
| H | 2.280692283  | 4.773065748 | 8.711788005  |
| H | 1.941474771  | 4.779645348 | 10.446926549 |
| C | 4.011331619  | 6.000940120 | 3.206429613  |
| C | 2.997482865  | 6.481179533 | 2.334032556  |
| C | 3.344109944  | 6.718298619 | 0.998661039  |
| H | 2.571151685  | 7.057549762 | 0.314330359  |
| C | 4.638941494  | 6.551003095 | 0.509739135  |
| C | 5.627378924  | 6.192813334 | 1.425705264  |
| H | 6.656429914  | 6.123242772 | 1.086198604  |
| C | 5.362757596  | 5.932295300 | 2.777589927  |
| C | 1.556341453  | 6.826104990 | 2.735738960  |
| H | 1.447559930  | 6.718587709 | 3.812439424  |
| C | 1.228027293  | 8.297897364 | 2.409023175  |
| H | 1.947472682  | 8.978040892 | 2.878776247  |
| H | 0.230138751  | 8.544805277 | 2.790375092  |
| H | 1.227890802  | 8.498206140 | 1.331919445  |
| C | 0.539352306  | 5.871858337 | 2.083654373  |
| H | 0.573111116  | 5.932414100 | 0.989387547  |
| H | -0.478500381 | 6.129385673 | 2.400376630  |
| H | 0.736515065  | 4.836751484 | 2.377703671  |
| C | 4.957924131  | 6.798856912 | -0.957874068 |
| H | 4.008993635  | 7.031488682 | -1.458748076 |
| C | 5.887566381  | 8.014016472 | -1.141857472 |
| H | 5.456558550  | 8.914974712 | -0.691366102 |
| H | 6.052489392  | 8.210769600 | -2.207666014 |



|   |             |             |              |
|---|-------------|-------------|--------------|
| H | 6.866159315 | 7.840460040 | -0.678879810 |
| C | 5.545315174 | 5.546229116 | -1.635115259 |
| H | 6.509681125 | 5.269329183 | -1.193060038 |
| H | 5.708801681 | 5.731498834 | -2.703092888 |
| H | 4.870917829 | 4.688282785 | -1.537045158 |
| C | 6.591496320 | 5.686706573 | 3.662918112  |
| H | 6.273154770 | 5.493064795 | 4.682257308  |
| C | 7.470342941 | 6.954200757 | 3.710577365  |
| H | 7.876819597 | 7.211599397 | 2.725653921  |
| H | 8.316519800 | 6.792548008 | 4.389243118  |
| H | 6.902659634 | 7.815113244 | 4.079657377  |
| C | 7.414160722 | 4.467203267 | 3.204013749  |
| H | 6.798742663 | 3.562984121 | 3.172311153  |
| H | 8.240508568 | 4.293179857 | 3.903750615  |
| H | 7.853248032 | 4.616660660 | 2.210476421  |

**Table S2.** DFT optimized coordinates for [Ni(ibaps)(H<sub>2</sub>O)].

|    |             |              |              |
|----|-------------|--------------|--------------|
| Ni | 5.617025042 | 4.908222100  | 7.171964233  |
| S  | 6.884455989 | 6.083398318  | 9.943909600  |
| S  | 3.471170429 | 5.595405558  | 4.869134158  |
| O  | 5.806586016 | 6.776462184  | 6.864364505  |
| H  | 6.008011515 | 7.235534402  | 7.721688694  |
| H  | 4.958393723 | 7.116000775  | 6.484076990  |
| O  | 6.428896874 | 7.346116783  | 9.295130355  |
| O  | 8.320454973 | 6.041071970  | 10.267024064 |
| O  | 3.471328298 | 6.843898734  | 5.686623862  |
| O  | 2.178748890 | 4.896834243  | 4.750513468  |
| N  | 5.714444086 | 3.060334649  | 7.256569885  |
| N  | 6.502633331 | 4.838159075  | 8.907033402  |
| N  | 4.553383338 | 4.575214985  | 5.585064800  |
| C  | 6.178962596 | 2.529750286  | 8.433056431  |
| C  | 6.144203588 | 1.171699232  | 8.831077839  |
| H  | 5.637753126 | 0.440481735  | 8.216596900  |
| C  | 6.705376376 | 0.782540934  | 10.035103245 |
| H  | 6.666911222 | -0.259067314 | 10.337495816 |
| C  | 7.318550723 | 1.738364546  | 10.860593189 |
| H  | 7.787708265 | 1.430548030  | 11.790418894 |
| C  | 7.315038944 | 3.087957162  | 10.520904364 |
| H  | 7.790483641 | 3.797081277  | 11.182389525 |
| C  | 6.700062801 | 3.521302729  | 9.333291761  |
| C  | 5.349144723 | 2.404315915  | 6.102164107  |
| C  | 5.655026901 | 1.071136737  | 5.741606543  |
| H  | 6.297133961 | 0.471586777  | 6.371760548  |
| C  | 5.186482447 | 0.547244075  | 4.547842646  |
| H  | 5.433565798 | -0.473387640 | 4.273582222  |
| C  | 4.410630854 | 1.342157400  | 3.689281574  |
| H  | 4.033098188 | 0.926029626  | 2.759884566  |
| C  | 4.147136546 | 2.675847023  | 3.990142098  |
| H  | 3.574870701 | 3.274441219  | 3.293543470  |
| C  | 4.637661657 | 3.240527477  | 5.178528802  |
| C  | 5.853917270 | 5.926345972  | 11.447987714 |
| C  | 6.423735438 | 5.893292714  | 12.753130213 |
| C  | 5.536059547 | 5.890601901  | 13.836258673 |
| H  | 5.953403916 | 5.875929033  | 14.836474531 |
| C  | 4.148589191 | 5.913646723  | 13.693458235 |
| C  | 3.635072826 | 5.938404228  | 12.399342996 |
| H  | 2.556941757 | 5.959425053  | 12.268768033 |
| C  | 4.446263448 | 5.949495518  | 11.259198756 |
| C  | 7.919604477 | 5.920844327  | 13.101030070 |
| H  | 8.486716750 | 5.544826056  | 12.254689907 |
| C  | 8.287375204 | 5.035187126  | 14.307359460 |
| H  | 7.924436977 | 5.436251055  | 15.259998685 |
| H  | 9.378858526 | 4.972019799  | 14.382177821 |

|   |              |             |              |
|---|--------------|-------------|--------------|
| H | 7.897231551  | 4.017274523 | 14.196378079 |
| C | 8.382472377  | 7.374374425 | 13.334778720 |
| H | 8.211009953  | 7.995482833 | 12.449700138 |
| H | 9.454824884  | 7.397078880 | 13.562053575 |
| H | 7.847510745  | 7.826753185 | 14.178542742 |
| C | 3.222790128  | 5.913261905 | 14.900951180 |
| H | 2.194543873  | 5.944348000 | 14.517880722 |
| C | 3.369420201  | 4.622738986 | 15.730061914 |
| H | 3.190951035  | 3.733601026 | 15.115328610 |
| H | 2.648040616  | 4.617068481 | 16.555284252 |
| H | 4.373035763  | 4.537827236 | 16.163242229 |
| C | 3.428259229  | 7.163098768 | 15.778261494 |
| H | 4.434853513  | 7.186362352 | 16.212232718 |
| H | 2.708514843  | 7.169615744 | 16.604881231 |
| H | 3.289590045  | 8.082296900 | 15.198464843 |
| C | 3.710305850  | 6.003938015 | 9.914862320  |
| H | 4.427238468  | 5.942857149 | 9.101929224  |
| C | 2.962178879  | 7.340192802 | 9.745652921  |
| H | 2.166803158  | 7.459492638 | 10.490081588 |
| H | 2.502152290  | 7.384097686 | 8.751641084  |
| H | 3.649558995  | 8.186983718 | 9.841346265  |
| C | 2.763291314  | 4.800872727 | 9.736795340  |
| H | 3.308087616  | 3.853556147 | 9.815807377  |
| H | 2.296347749  | 4.842059296 | 8.745915281  |
| H | 1.959918328  | 4.791635504 | 10.481107959 |
| C | 4.006390813  | 6.047298745 | 3.175251442  |
| C | 2.983847295  | 6.465323266 | 2.281502089  |
| C | 3.334929206  | 6.647452528 | 0.938688530  |
| H | 2.559053026  | 6.938807996 | 0.236364284  |
| C | 4.636136193  | 6.488326125 | 0.464572708  |
| C | 5.629184424  | 6.199433712 | 1.400724325  |
| H | 6.661891500  | 6.143696637 | 1.070500608  |
| C | 5.363039119  | 5.994919088 | 2.760597008  |
| C | 1.535656395  | 6.805008545 | 2.660941512  |
| H | 1.423319977  | 6.752280160 | 3.741715986  |
| C | 1.185226791  | 8.252922167 | 2.258343271  |
| H | 1.892483403  | 8.967966310 | 2.693159390  |
| H | 0.182839128  | 8.501543767 | 2.625955758  |
| H | 1.183387646  | 8.396974586 | 1.172491342  |
| C | 0.537181319  | 5.802327515 | 2.054126462  |
| H | 0.572141187  | 5.812759398 | 0.958346195  |
| H | -0.485077728 | 6.057488318 | 2.357497339  |
| H | 0.750412503  | 4.784932802 | 2.395271355  |
| C | 4.957030594  | 6.673904882 | -1.011434722 |
| H | 4.005996698  | 6.864044459 | -1.525699010 |
| C | 5.863417007  | 7.897481958 | -1.247872112 |
| H | 5.410790856  | 8.810233865 | -0.844994671 |
| H | 6.031568528  | 8.044656787 | -2.321003747 |

|   |             |             |              |
|---|-------------|-------------|--------------|
| H | 6.842102812 | 7.767218204 | -0.771195575 |
| C | 5.571647775 | 5.402086526 | -1.625799253 |
| H | 6.539610332 | 5.165779229 | -1.168454942 |
| H | 5.735329336 | 5.540159189 | -2.700724116 |
| H | 4.913766957 | 4.536682806 | -1.489249297 |
| C | 6.588170335 | 5.829466529 | 3.667849737  |
| H | 6.264527752 | 5.660471605 | 4.689533373  |
| C | 7.413763310 | 7.133258780 | 3.680921812  |
| H | 7.822400120 | 7.369197272 | 2.691850729  |
| H | 8.255311825 | 7.031480638 | 4.376129407  |
| H | 6.805300228 | 7.983160623 | 4.008348668  |
| C | 7.464271585 | 4.627025475 | 3.267602614  |
| H | 6.889201174 | 3.695717809 | 3.265761765  |
| H | 8.289951927 | 4.516326585 | 3.980368697  |
| H | 7.905467666 | 4.753239747 | 2.272341554  |

**Table S3.** Assignments of the TD-DFT computed vertical excitations for [Ni(ibaps)(H<sub>2</sub>O)]<sup>-</sup> and [Ni(ibaps)(H<sub>2</sub>O)].

| Complex                                    | $\lambda_{\text{calc}}$ (nm) | assignment                  | $\lambda_{\text{exp}}$ (nm) |
|--------------------------------------------|------------------------------|-----------------------------|-----------------------------|
| [Ni(ibaps)(H <sub>2</sub> O)] <sup>-</sup> | 485 nm                       | d - d                       | 465 nm                      |
|                                            | 747 nm                       | d - d                       | 775 nm                      |
|                                            | 840 nm                       | d - d                       |                             |
| [Ni(ibaps)(H <sub>2</sub> O)] <sup>0</sup> | 458 nm                       | Intraligand $\pi^* - \pi^*$ | 458 nm                      |
|                                            | 582 nm                       | Intraligand $\pi^* - \pi^*$ | 620 nm                      |
|                                            | 791 nm                       | MLCT d - $\pi^*$            | 823 nm (sh)                 |
|                                            | 994 nm                       | MLCT d - $\pi^*$            | 924 nm                      |

**Table S4.** Crystallographic Data for (Et<sub>4</sub>N)[Ni<sup>II</sup>(ibaps)(OH<sub>2</sub>)].

|                                         |                                                                                   |
|-----------------------------------------|-----------------------------------------------------------------------------------|
| Empirical Formula                       | [C <sub>50</sub> H <sub>76</sub> NiN <sub>5</sub> O <sub>5</sub> S <sub>2</sub> ] |
| Fw                                      | 935.97                                                                            |
| T (K)                                   | 133(2)                                                                            |
| Space group                             | <i>P</i> $\bar{1}$                                                                |
| a (Å)                                   | 9.116(2)                                                                          |
| b (Å)                                   | 9.433(2)                                                                          |
| c (Å)                                   | 28.383(7)                                                                         |
| α(°)                                    | 93.064(3)                                                                         |
| β(°)                                    | 90.198(3)                                                                         |
| γ(°)                                    | 95.622(3)                                                                         |
| Z                                       | 2                                                                                 |
| V (Å <sup>3</sup> )                     | 4244.3(5)                                                                         |
| δ <sub>calcd</sub> (Mg/m <sup>3</sup> ) | 1.282                                                                             |
| R1                                      | 0.0414                                                                            |
| wR1                                     | 0.0925                                                                            |
| GOF                                     | 1.041                                                                             |
| CCDC #                                  | 1899747                                                                           |
